# Supplementary material for: The Systematic Workplace-Improvement Needs Generation (SWING): Verifying a Worker-Centred Tool for Identifying Necessary Workplace Improvements in a Nursing Home in Japan
Source: MDPI journal article supplement (doi:10.3390/ijerph19031671), 2022-02-01
Supplement: s1 [file s1]

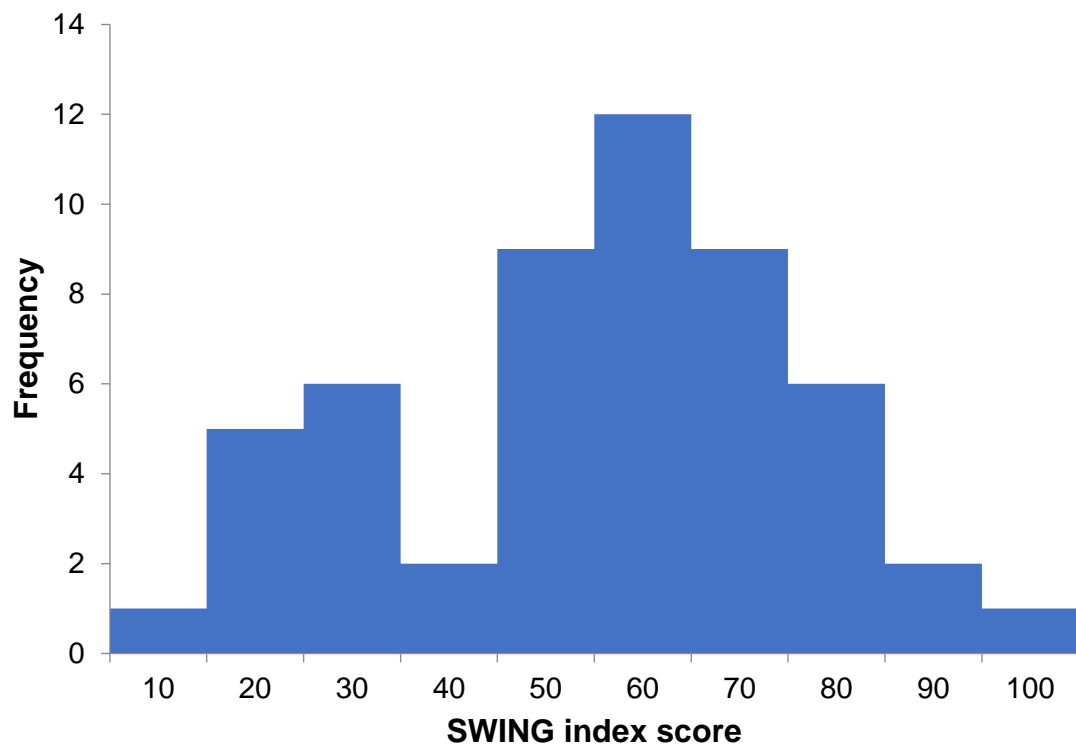

Supplement 3 (Figure S1). Distribution of SWING index score (mean=51.5, SD=21.2). The normality of the distribution was confirmed by Shapiro-Wilk test ( $p = 0.145$ ).
