# Supplementary material for: The Systematic Workplace-Improvement Needs Generation (SWING): Verifying a Worker-Centred Tool for Identifying Necessary Workplace Improvements in a Nursing Home in Japan
Source: MDPI journal article supplement (doi:10.3390/ijerph19031671), 2022-02-01
Supplement: s1 [file s1]

以下の質問事項について、順番に回答し、表に記入をして下さい。

1. あなたにとって、どのような職場が働きやすいですか。  
大切だと思うことを「必ず5つ」挙げてください。  
単語ではなく、文章で具体的に記載して下さい。
2. いま挙げてもらった5つについて、現在、どの程度、満たされていますか。  
100点満点中何点で答えてください。5つの項目、それぞれに回答、お願いします。
3. 5つの項目について、重要性のバランスをお尋ねします。  
5つの合計が100%になるように、それぞれの割合を教えてください。

|   | 1.<br>どのような職場が働きやすいか。<br>大切だと思うこと、必ず5つ挙げて下さい。 | 2.<br>どの程度満たされているか<br>項目ごと 100 点満点中                 | 3.<br>5つの重要性のバランス<br>全部の合計が 100%        |
|---|-----------------------------------------------|-----------------------------------------------------|-----------------------------------------|
| 1 |                                               | (100 点満点中)<br><br><br><br><br><br><br><br><br><br>点 | <br><br><br><br><br><br><br><br><br>+ % |
| 2 |                                               | (100 点満点中)<br><br><br><br><br><br><br><br><br>点     | + %                                     |
| 3 |                                               | (100 点満点中)<br><br><br><br><br><br><br><br><br>点     | + %                                     |
| 4 |                                               | (100 点満点中)<br><br><br><br><br><br><br><br><br>点     | + %                                     |
| 5 |                                               | (100 点満点中)<br><br><br><br><br><br><br><br><br>点     | + %                                     |
|   |                                               |                                                     | 合計   <br><u>100 %</u>                   |
