# Supplementary material for: The Systematic Workplace-Improvement Needs Generation (SWING): Verifying a Worker-Centred Tool for Identifying Necessary Workplace Improvements in a Nursing Home in Japan
Source: MDPI journal article supplement (doi:10.3390/ijerph19031671), 2022-02-01
Supplement: s1 [file s1]

Please answer the following questions (in order) and fill the required information in the table given.

1. What kind of workplace is easy/comfortable for you to work in?
  - **Please list five things** that you think are important.
  - Please be specific in your answer, using sentences instead of words.
2. To what extent have these five things been fulfilled?
  - How many points (**out of 100**) would you give to **each of the five items?**
3. How would you rank the five items in order of importance?
  - **Please state the percentage of each item so that the total of the five items adds up to 100%.**

|   | 1. What kind of workplace is easy/comfortable for you to work in? | 2. To what extent have these five things been fulfilled? (out of 100) | 3. How would you rank the five items in order of importance? (the total of the five items adds up to 100%)         |
|---|-------------------------------------------------------------------|-----------------------------------------------------------------------|--------------------------------------------------------------------------------------------------------------------|
| 1 |                                                                   | points                                                                | <div><div></div><div></div><div></div><div></div><div></div></div> <div>%</div>                                    |
| 2 |                                                                   | points                                                                | <div><div></div><div></div><div></div><div></div><div></div></div> <div>%</div>                                    |
| 3 |                                                                   | points                                                                | <div><div></div><div></div><div></div><div></div><div></div></div> <div>%</div>                                    |
| 4 |                                                                   | points                                                                | <div><div></div><div></div><div></div><div></div><div></div></div> <div>%</div>                                    |
| 5 |                                                                   | points                                                                | <div><div></div><div></div><div></div><div></div><div></div></div> <div>%</div>                                    |
|   |                                                                   |                                                                       | <div><div></div><div></div><div></div><div></div><div></div></div> <div><b>Total</b></div> <div><b>100 %</b></div> |
